# Supplementary material
Source: PubMed Central journal article supplement (PMC6951343)
Supplement: 41422_2019_242_MOESM1_ESM.pdf [file 41422_2019_242_MOESM1_ESM.pdf]

**Fig. S1**

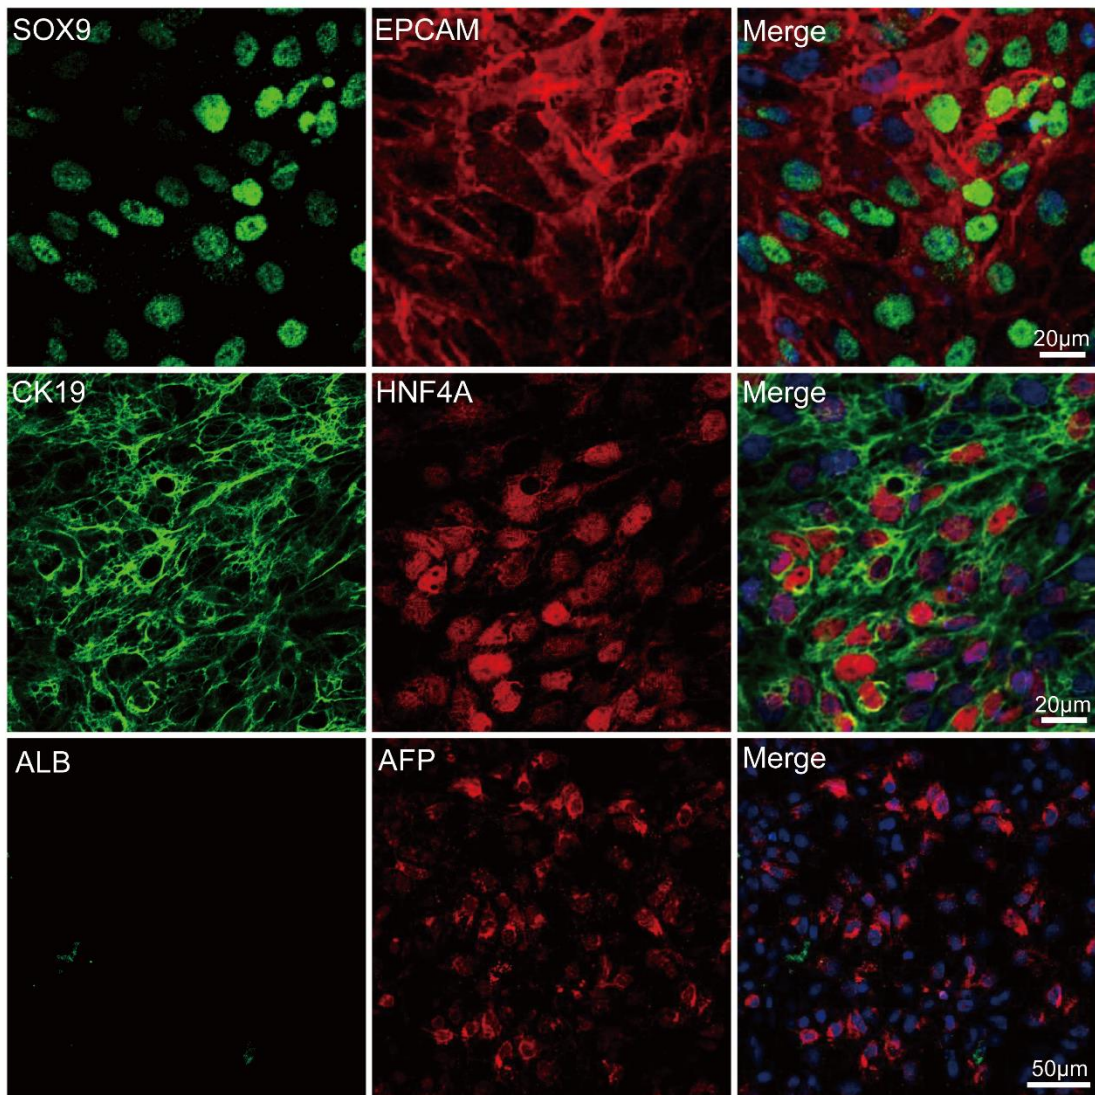

**Supplementary information, Fig. S1 Immunofluorescent stainings of cells at hepatic specification stage (HS) are shown, related to Fig.1.**
