# Supplementary material
Source: PubMed Central journal article supplement (PMC6951343)
Supplement: 41422_2019_242_MOESM2_ESM.pdf [file 41422_2019_242_MOESM2_ESM.pdf]

**Fig. S2**

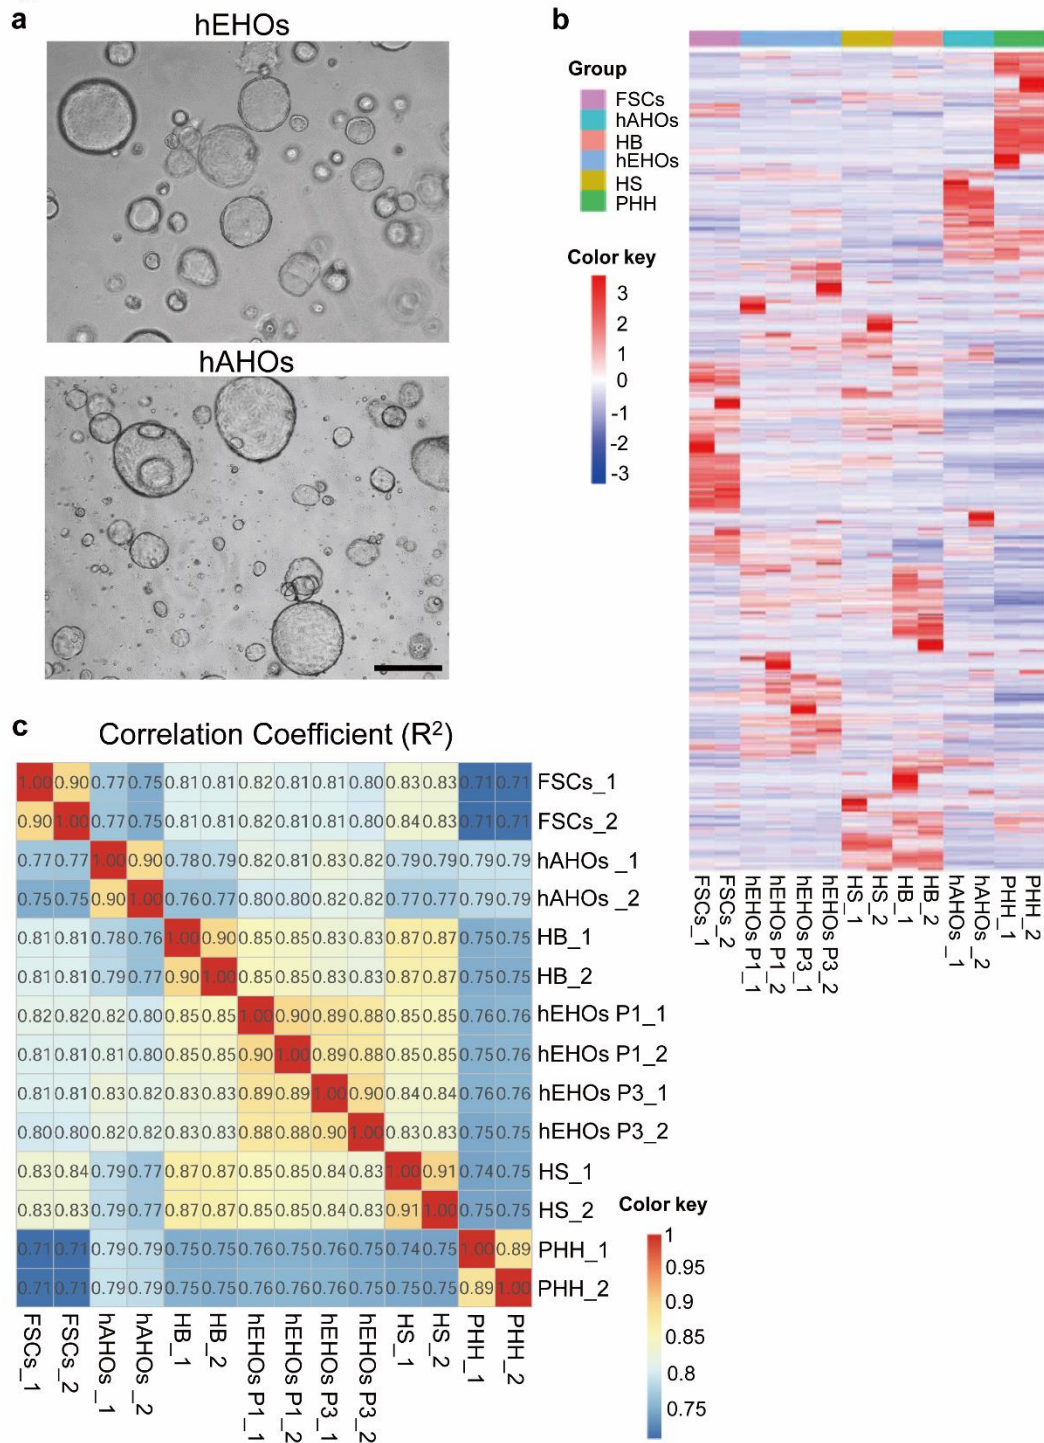

**Supplementary information, Fig. S2 Gene expression profile of hEHOs, related to Fig.2.** (a) Representative morphology of hEHOs and hAHOs. (b) Heatmap of the global gene expression in PHH, hAHOs, FSCs, HS, HB, and hEHOs at passage 1 and passage 3. (c) Correlation plot showing Pearson's correlation coefficient between biological replicates of PHH, hAHOs, FSCs, HS, HB, and hEHOs at passage 1 and passage 3. Scale bar: 100  $\mu$ m (a).
