# Supplementary material
Source: PubMed Central journal article supplement (PMC6951343)
Supplement: 41422_2019_242_MOESM3_ESM.pdf [file 41422_2019_242_MOESM3_ESM.pdf]

**Fig. S3**

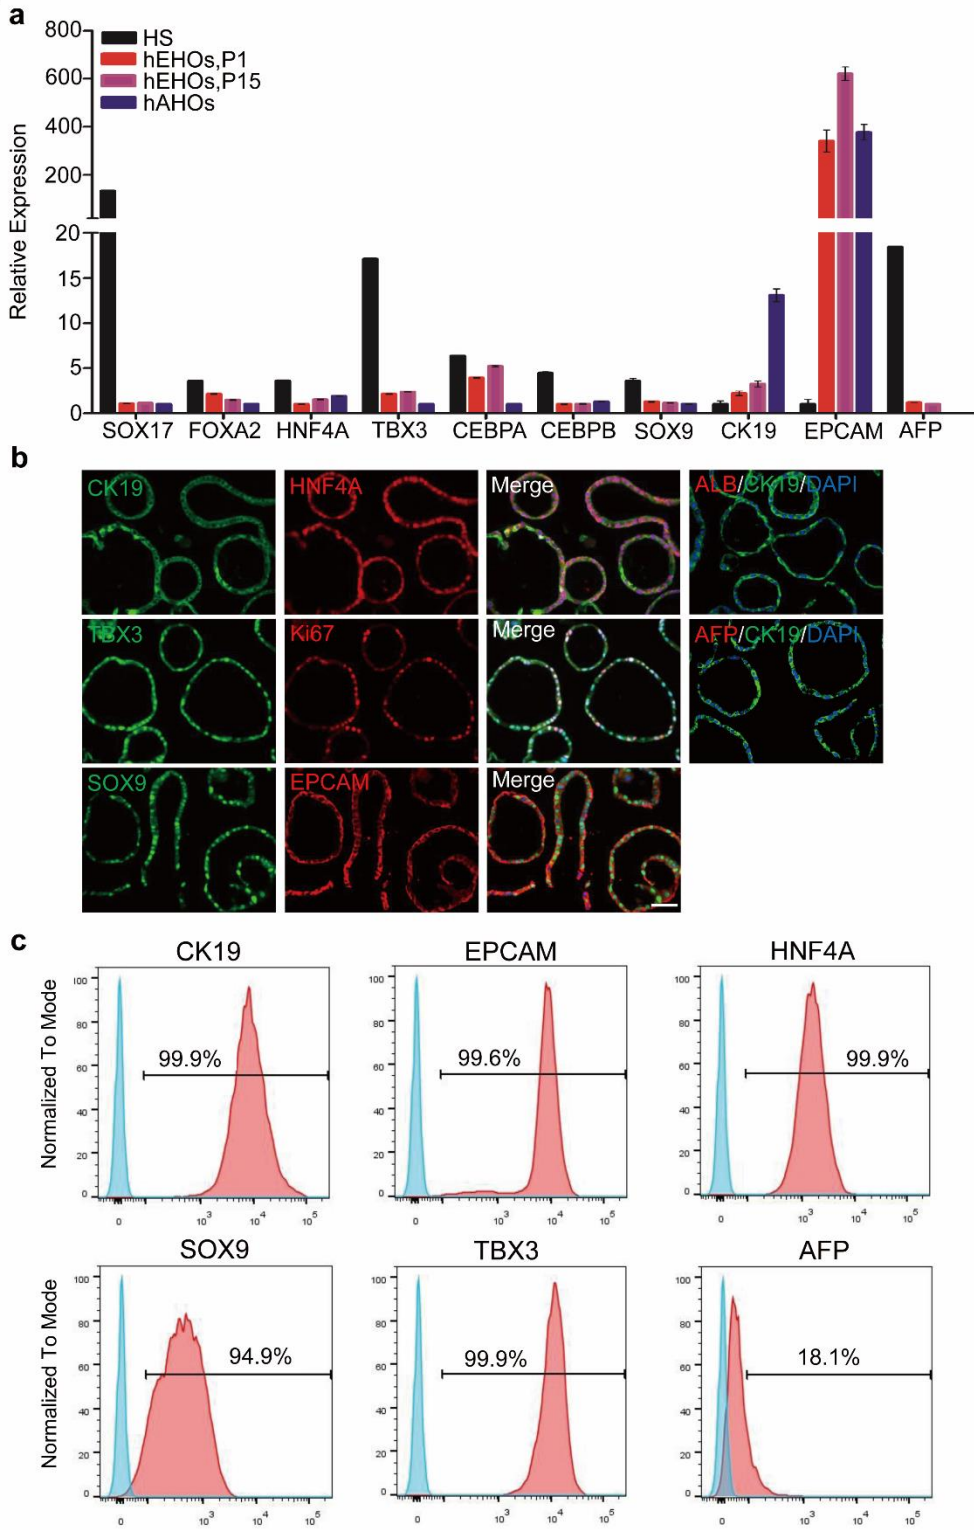

**Supplementary information, Fig. S3 Characterization of hEHOs, related to Fig.2.** (a) qRT-PCR of the indicated markers in hEHOs of passage 1 and 15 in comparison with HS, and hAHOs. The lowest expression levels were normalized to 1. Results are presented as mean  $\pm$  SD from 3 replicates from three independent repeated experiments. (b) Immunostainings of hAHOs with SOX9, CK19, EPCAM, HNF4A, AFP, ALB, TBX3 and Ki67. (c) Expression of indicated liver stem/progenitor cell markers examined by flow cytometry in hEHOs (passage 5). Scale bar: 50  $\mu$ m (b).
