# Supplementary material
Source: PubMed Central journal article supplement (PMC6951343)
Supplement: 41422_2019_242_MOESM6_ESM.pdf [file 41422_2019_242_MOESM6_ESM.pdf]

**Fig. S6**

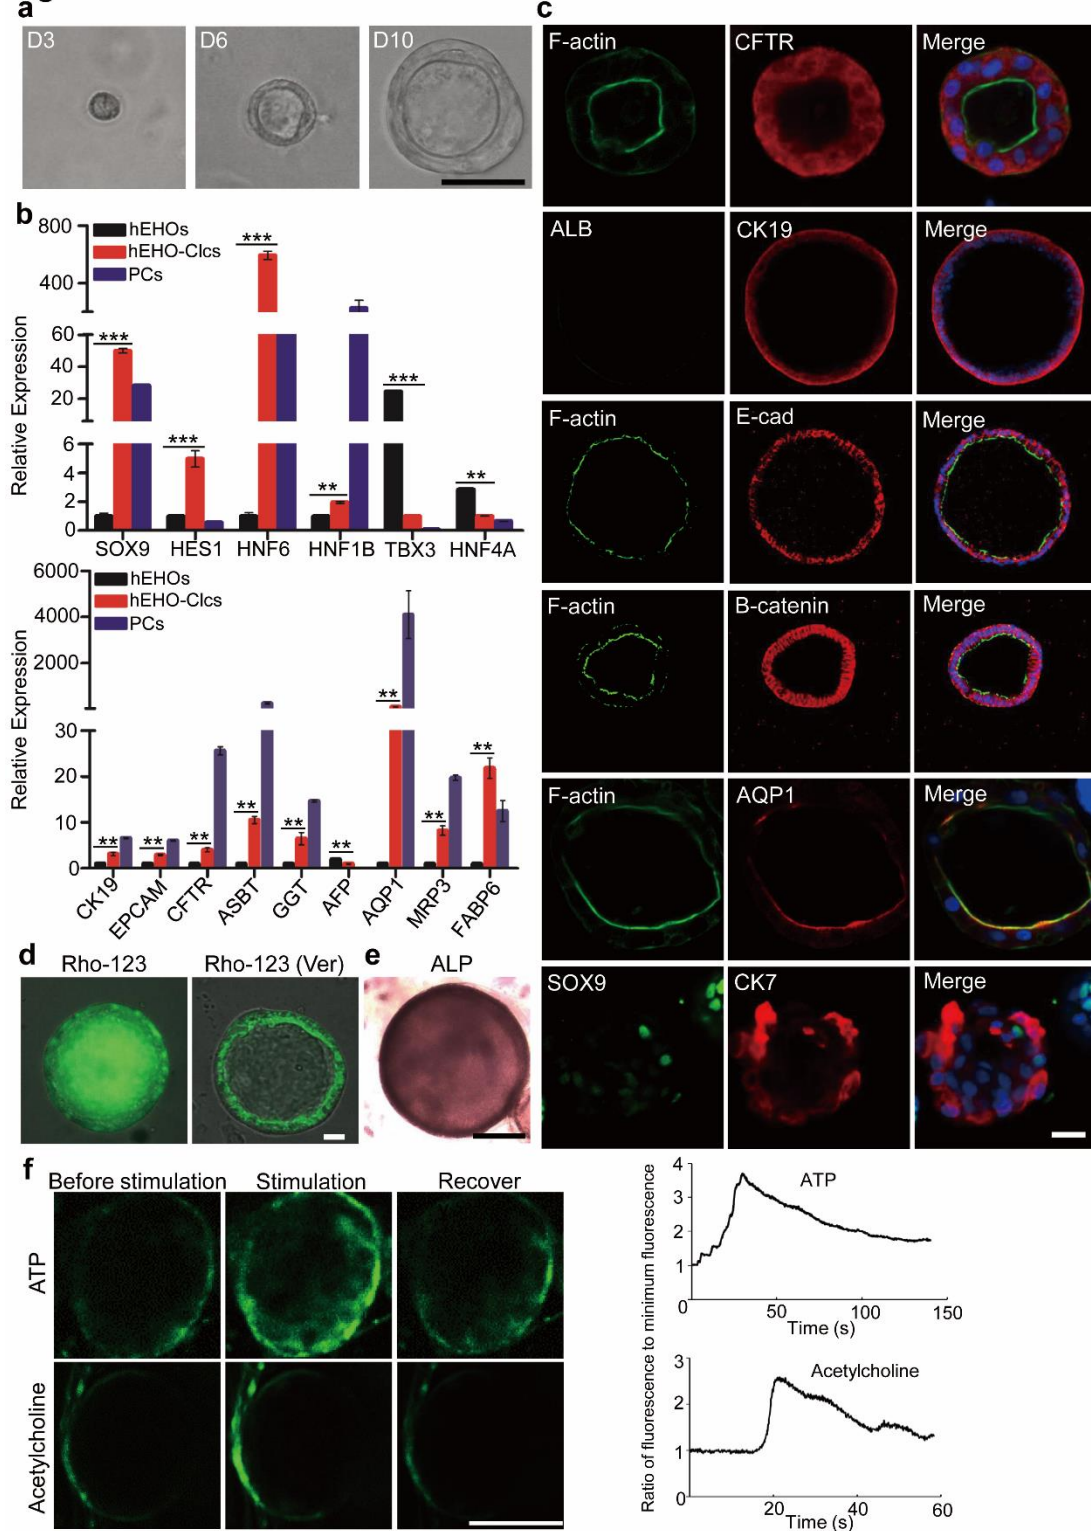

**Supplementary information, Fig. S6 Cells of hEHOs could differentiate into cholangiocytes in vitro.** (a) Representative phase-contrast morphology of hEHO-Clcs at day 3, 6, and 10 of the culture. (b) Gene expression profile of hEHO-Clcs compared with undifferentiated hEHOs and PCs. The lowest expression levels were normalized to 1. Results are presented as mean  $\pm$  SD from 3 replicates from three independent repeated experiments. (c) hEHO-Clcs were examined for localization of epithelial polarity and cholangiocyte markers. (d) Rhodamine 123 (Rho-123) can be transported into the central lumen of hEHO-Clcs (left panel) and the MDR inhibitor Verapamil (Ver) blocks luminal accumulation of Rhodamine 123 (Right panel). (e) Staining of hEHO-Clcs for ALP activity. (f) Analyzing the response of hEHO-Clcs to ATP and acetylcholine by calcium indicator Fluo-4-based fluorescence intensity measurements.  $**P < 0.01$ ;  $*** P < 0.001$ . Scale bar: 100  $\mu\text{m}$  (a, e and f), 50  $\mu\text{m}$  (c), 33  $\mu\text{m}$  (d). hEHO-Clcs, hEHO-derived cholangiocytes; PCs, primary cholangiocytes; MDR, multidrug resistance; ALP, alkaline phosphatase.
