# Supplementary material
Source: PubMed Central journal article supplement (PMC6951343)
Supplement: 41422_2019_242_MOESM7_ESM.pdf [file 41422_2019_242_MOESM7_ESM.pdf]

**Fig. S7**

**a**

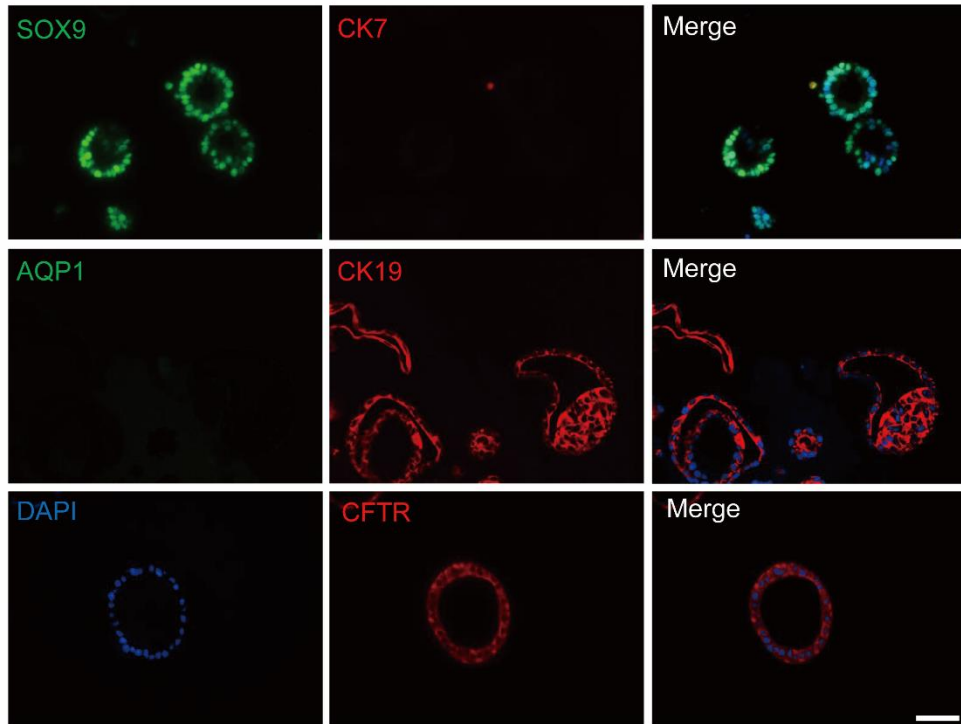

**b**

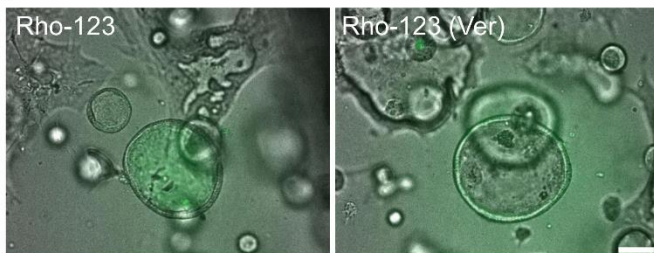

**c**

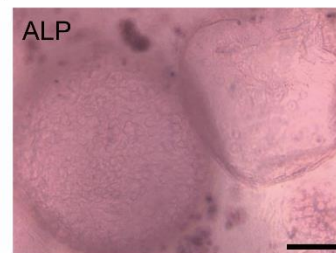

**Supplementary information, Fig. S7 Characterization of cholangiocytes-associated markers on undifferentiated hEHOs.** (a) Immunofluorescence stainings for CK7, AQP1 and CFTR in undifferentiated hEHOs. (b) Transport of Rhodamine 123 (Rho-123) in undifferentiated hEHOs. (c) Staining of undifferentiated hEHOs for ALP activity. Scale bar: 50 $\mu$ m(a), 100 $\mu$ m(b and c).
