# Supplementary material
Source: PubMed Central journal article supplement (PMC6951343)
Supplement: 41422_2019_242_MOESM8_ESM.pdf [file 41422_2019_242_MOESM8_ESM.pdf]

**Fig. S8**

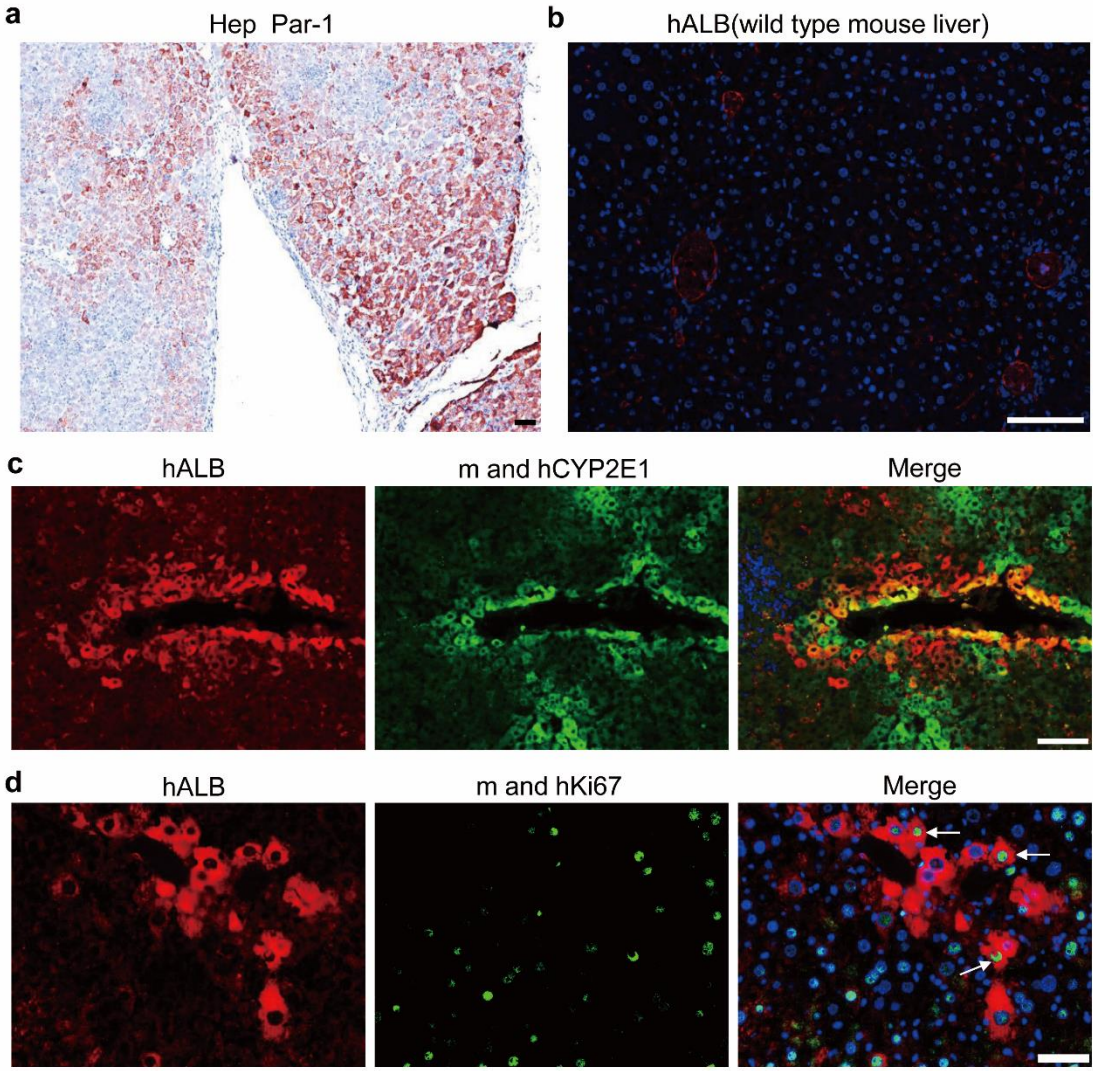

**Supplementary information, Fig. S8 Engraftment of hEHOs into FRG mice, related to Fig.6.** (a) IHC with antibody anti-human hepatocyte-specific antigen (Hep Par-1). (b) Control staining for human specific albumin (hALB) in mouse liver. (c) Co-immunostaining for hALB and human and mouse CYP2E1 (m and hCYP2E1) in hEHOs-engrafted FRG mice. (d) Co-immunostaining for hALB and Ki67 identifies proliferating cells derived from hEHOs after transplantation. Arrowheads indicate double positive cells for hALB and Ki67. Scale bar: 50 $\mu$ m (a and d), 100 $\mu$ m (b and c).
